# Supplementary material
Source: publisher figshare collection journal article supplement (https://tandf.figshare.com/articles/dataset/_/3475409)
Supplement: Supplementary file 2 [file 1]

# Main Map 2: An example of fluted till surface at Northern side of the Nordenskiöldbreen foreland, Adolfbukta, Svalbard

Marek W. Ewertowski<sup>1,2</sup>, David J.A. Evans<sup>1</sup>, David H. Roberts<sup>1</sup> and Aleksandra M. Tomczyk<sup>2,3</sup>

<sup>1</sup> Department of Geography, Durham University, Durham, United Kingdom  
<sup>2</sup> Faculty of Geographical and Geological Sciences, Adam Mickiewicz University, Poznań, Poland  
<sup>3</sup> Environment Department, University of York, Heslington, York, United Kingdom

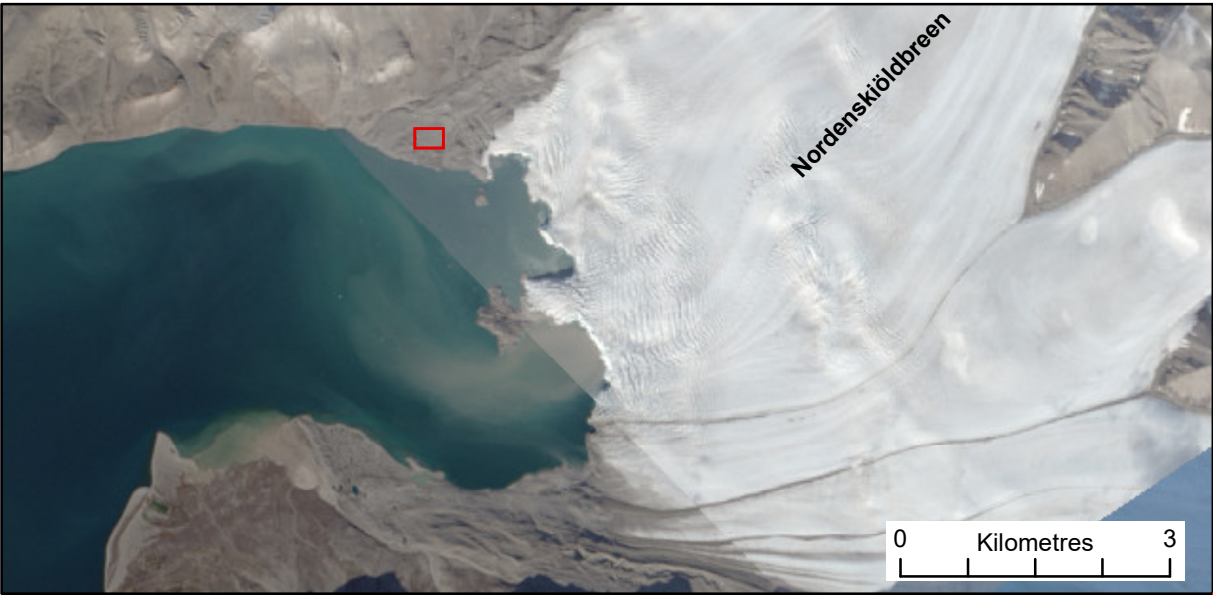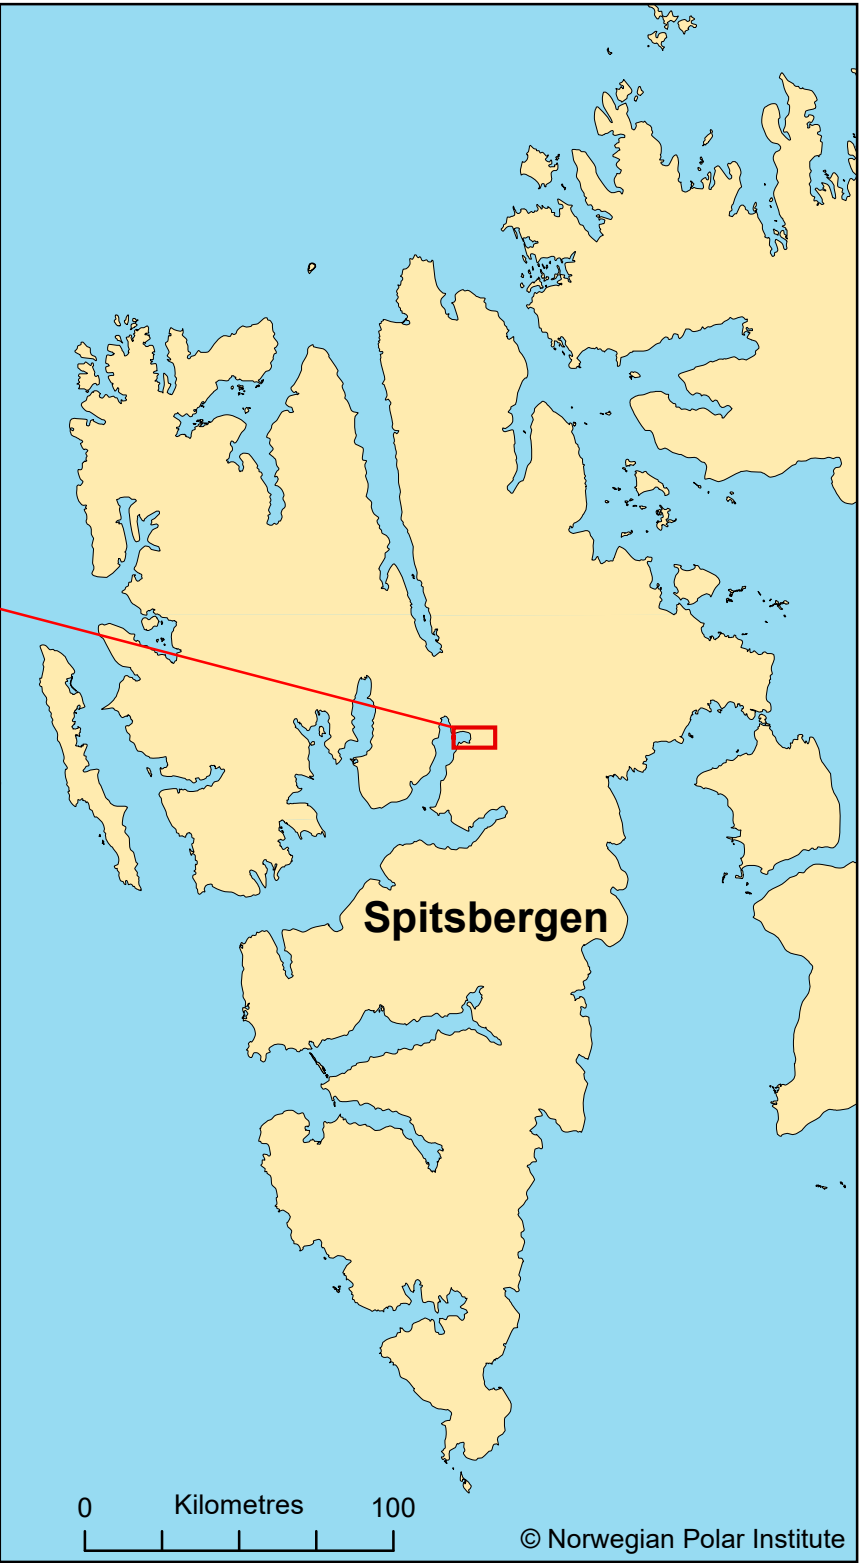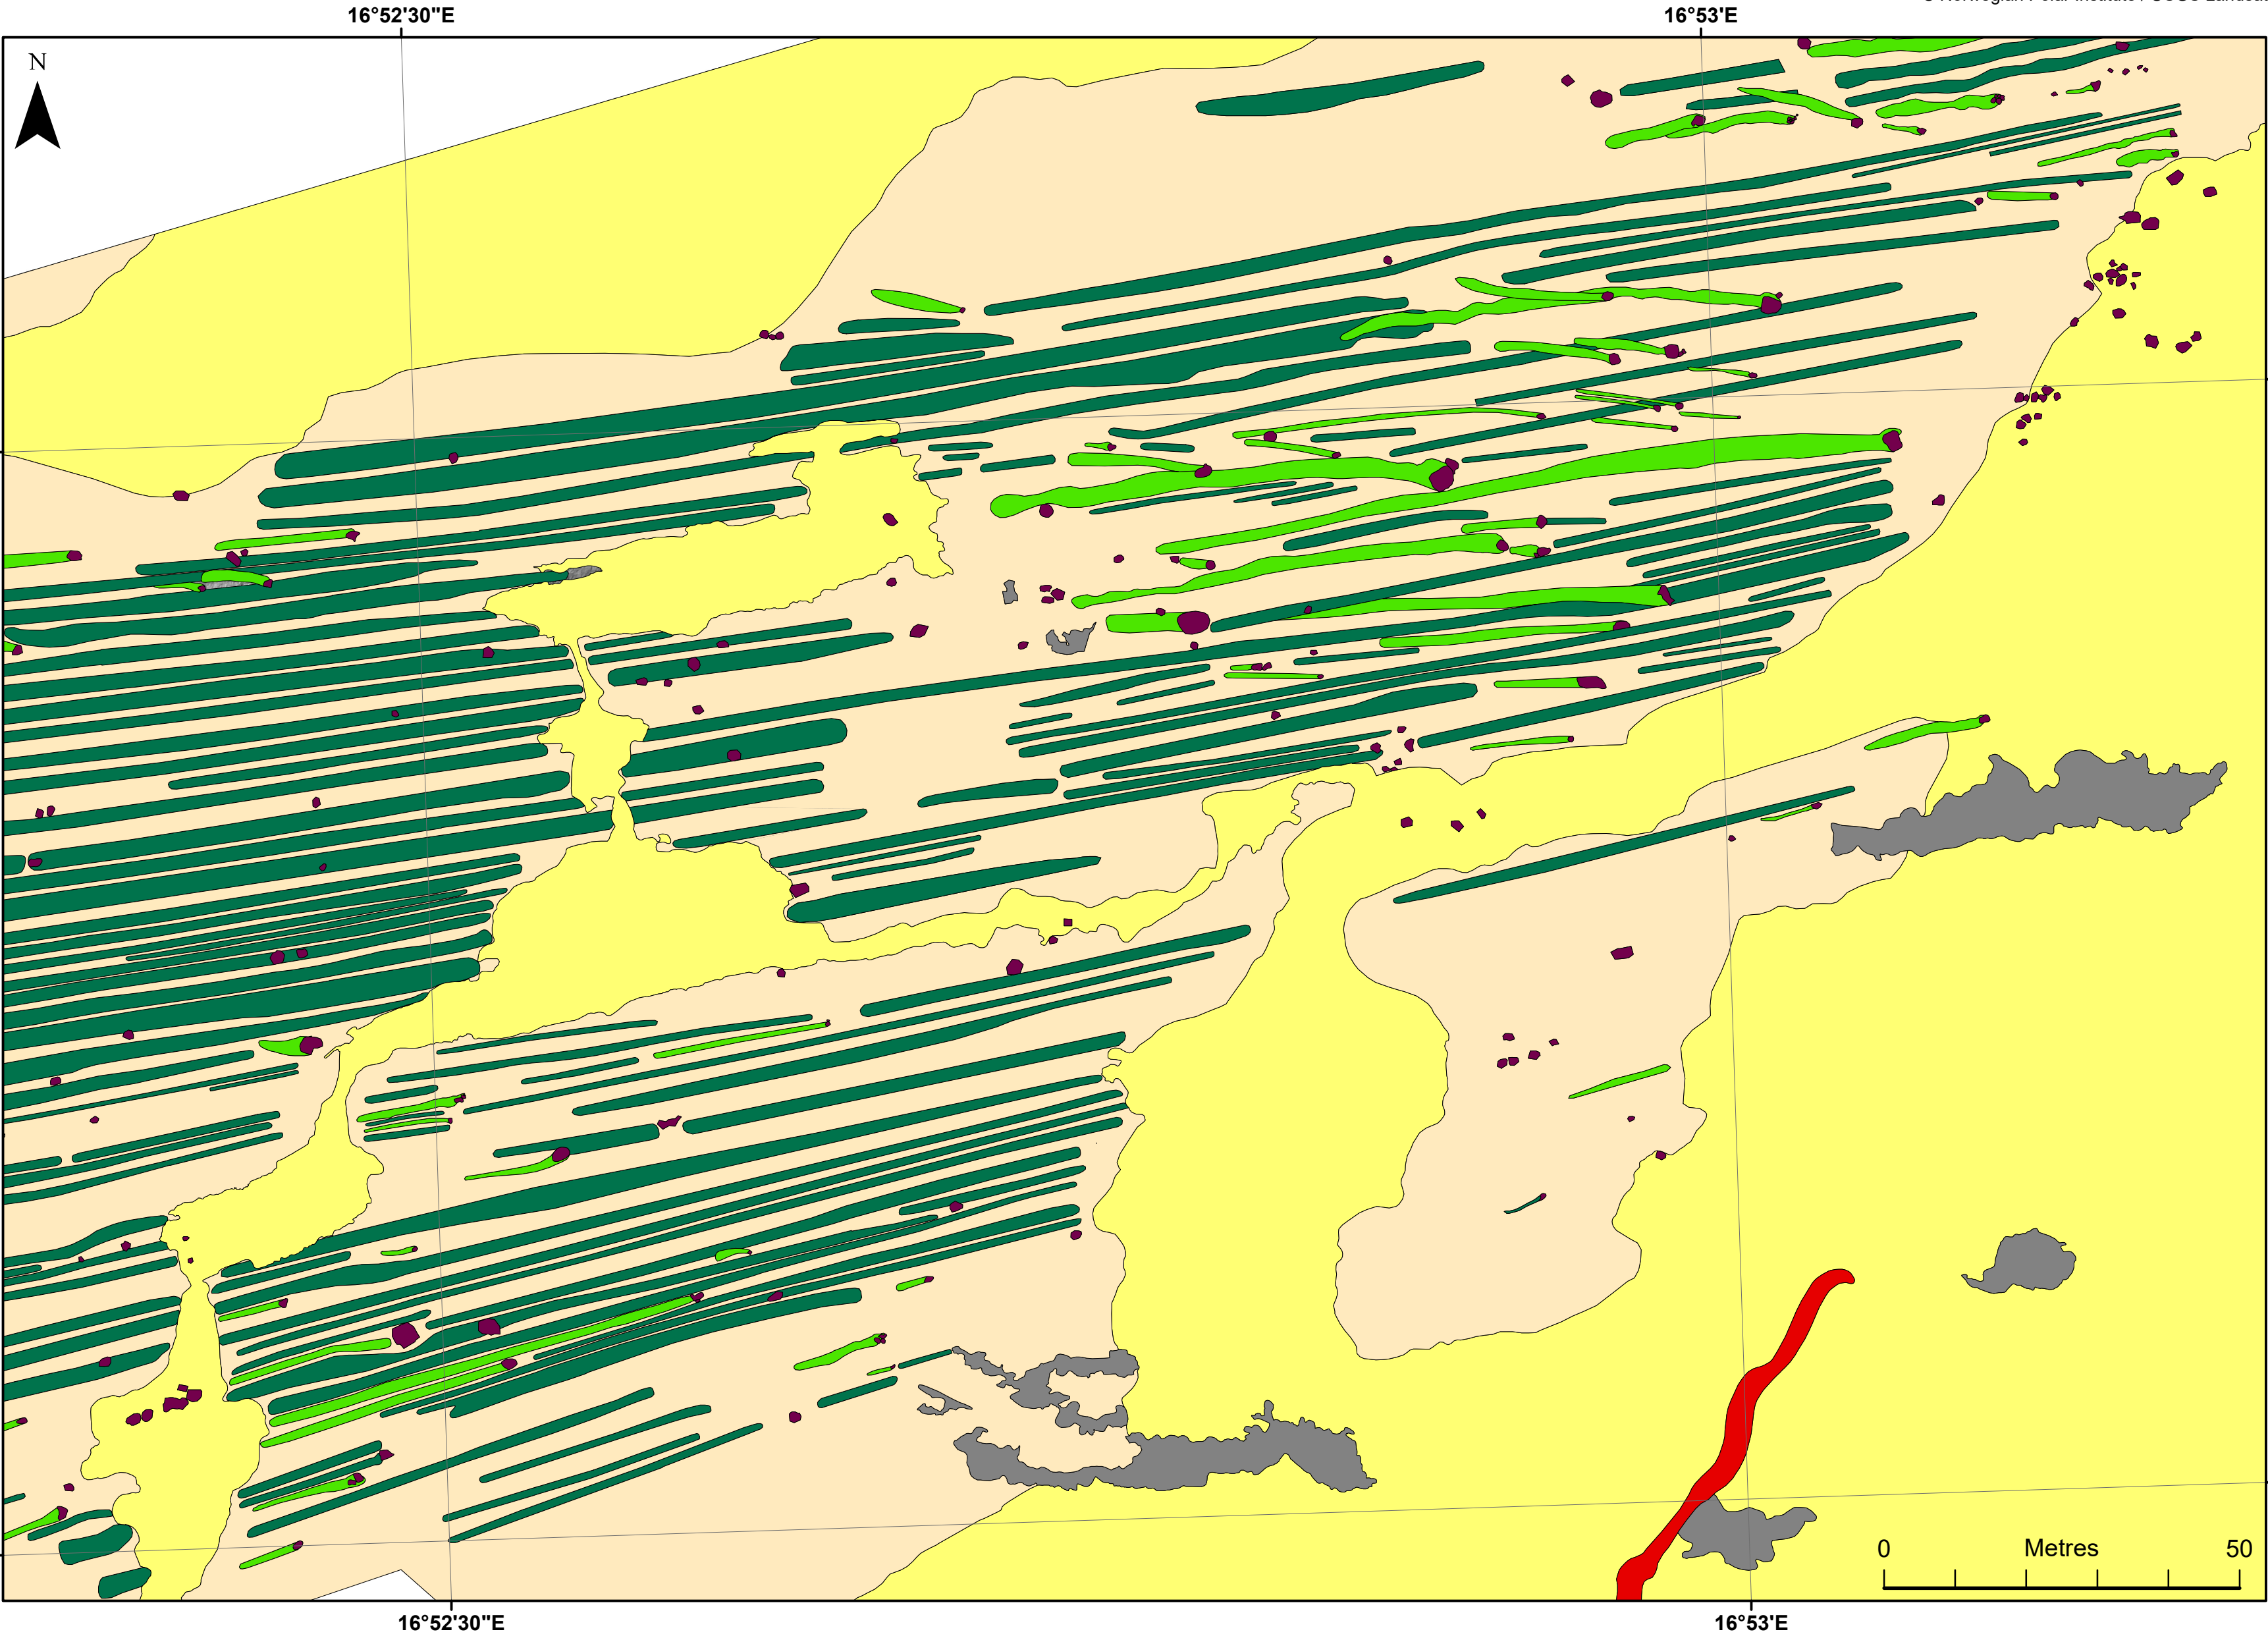

- till
- bedrock
- glaciifluvial deposits
- flute not associated with boulder
- flute associated with boulder
- boulder
- esker

Projection: UTM zone 33N / WGS 1984

Map based on UAV imagery captured at 29th July 2014.

Field verification in 2005, 2007, 2013 and 2014.

Map to accompany paper:  
Ewertowski M.W., Evans D.J.A., Roberts D.H., and Tomczyk A.M. 2016. Glacial geomorphology of terrestrial parts of tidewater glacier: Nordenskiöldbreen, Svalbard

© Journal of Maps, 2015
